# Supplementary material for: Synthetic Studies toward 5,6,7,3′,4′-Monomethoxytetrahydroxyflavones: Synthesis of Pedalitin
Source: MDPI journal article supplement (doi:10.3390/molecules29020513), 2024-01-19

## **Synthetic studies toward 5,6,7,3',4'-monomethoxytetrahydroxyflavones: Synthesis of Pedalitin**

Koteswara Rao Kamma<sup>1,†</sup>, Joungmo Cho<sup>2,†</sup>, Hyo Jun Won<sup>3</sup>, So-Yeon Nam<sup>1</sup>, Ngan Hong Le<sup>2</sup>, Je Hyeong Jung<sup>3</sup>, and Kee-In Lee<sup>1,2,\*</sup>

<sup>1</sup> R&D Center, Molecules & Materials Co., Ltd., Daejeon 34013, Republic of Korea

<sup>2</sup> Green Chemistry Division, Korea Research Institute of Chemical Technology, Daejeon 34114, Republic of Korea

<sup>3</sup> Smart Farm Research Center, Korea Institute of Science and Technology, Gangneung, 25451, Republic of Korea

<sup>†</sup> These authors contributed equally to this work.

\* Author to whom correspondence should be addressed: kilee@krikt.re.kr

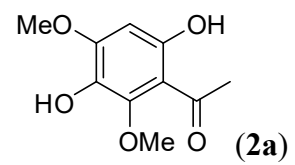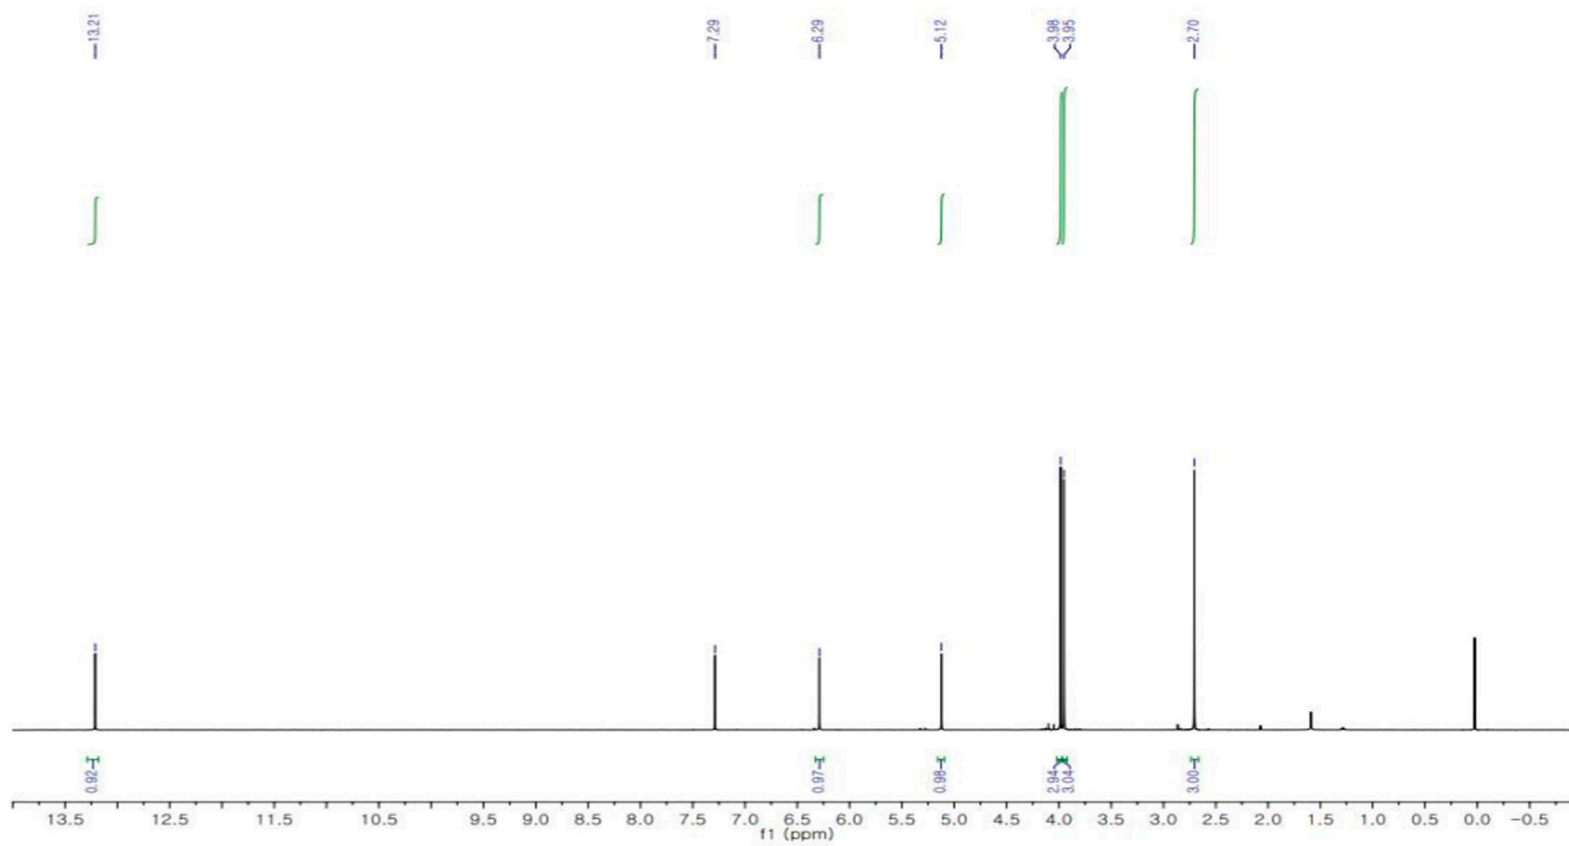

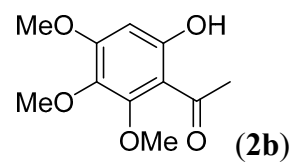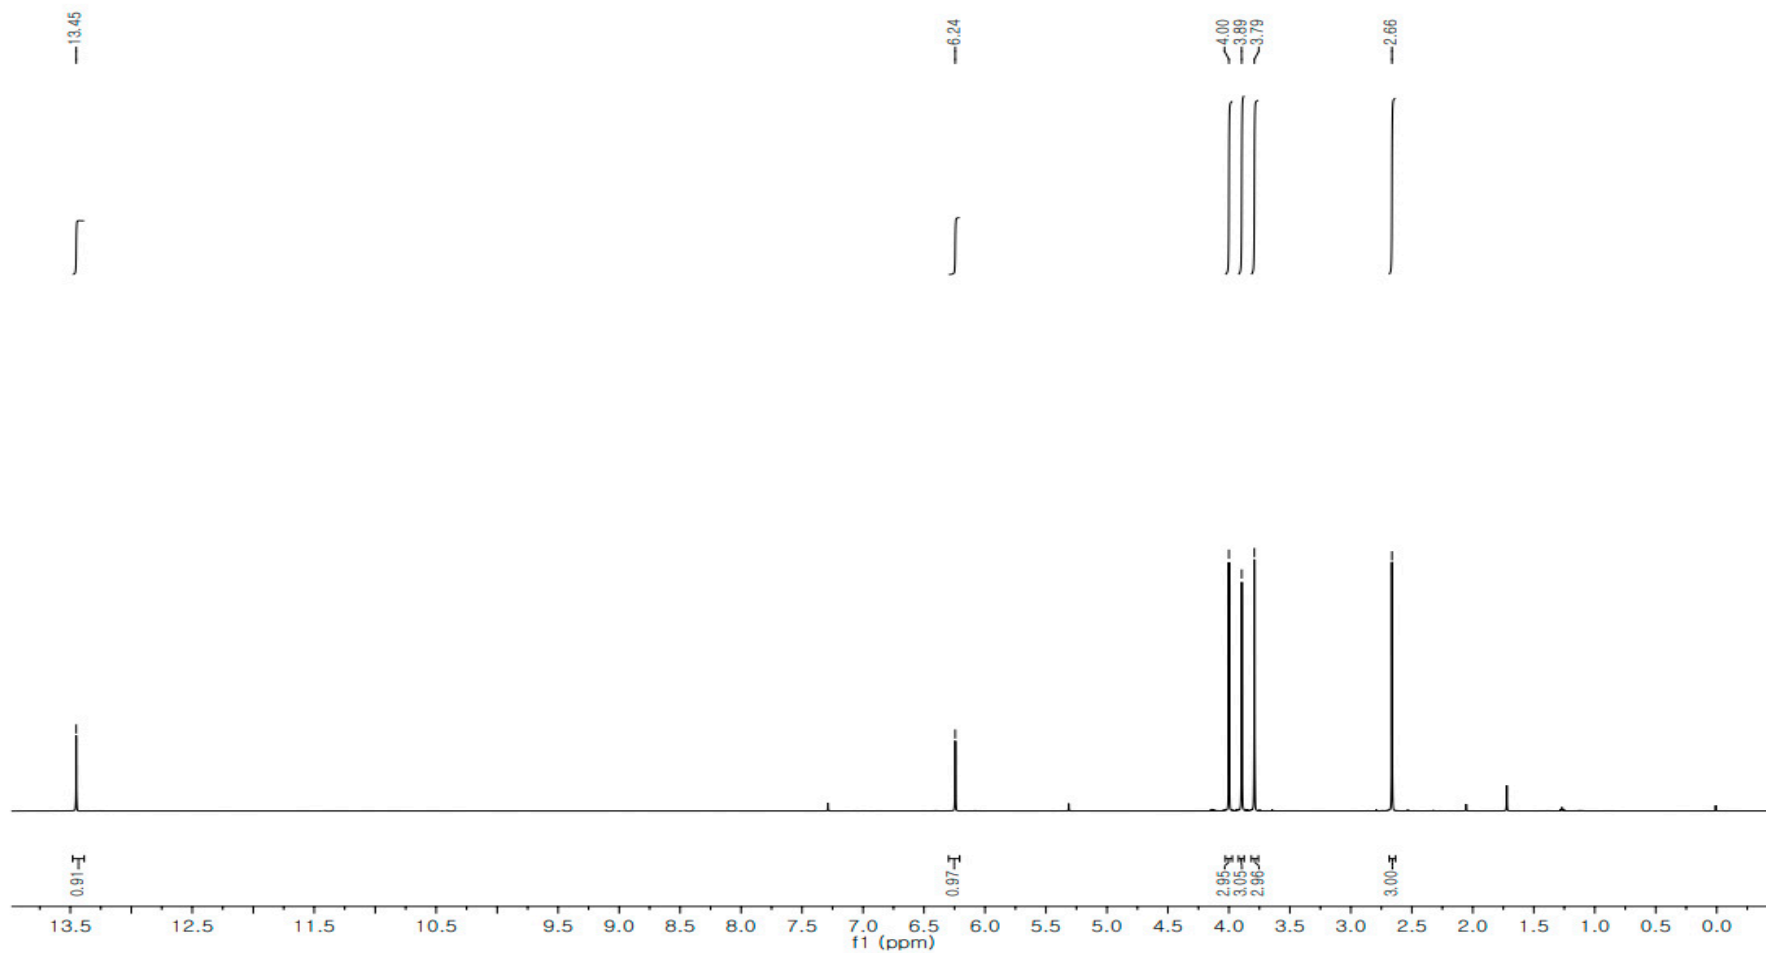

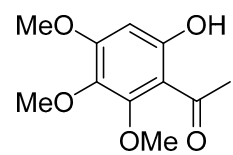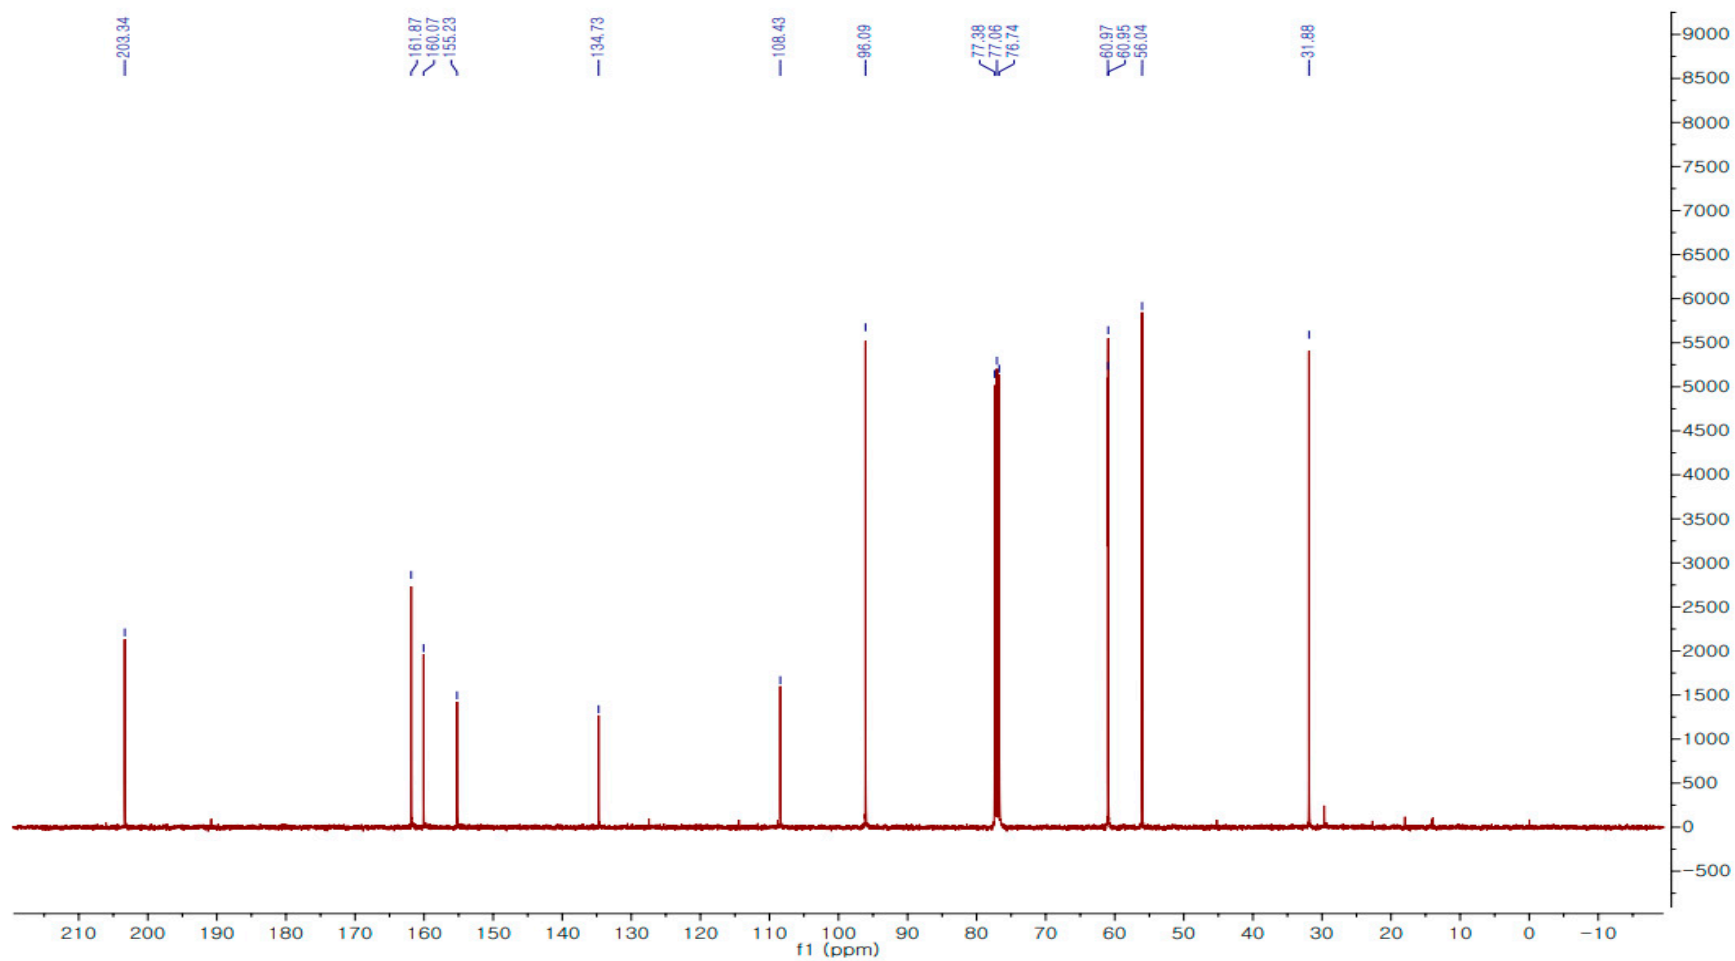

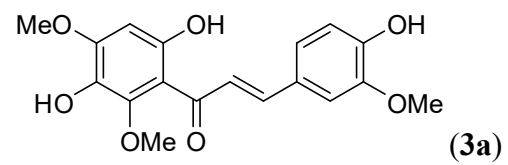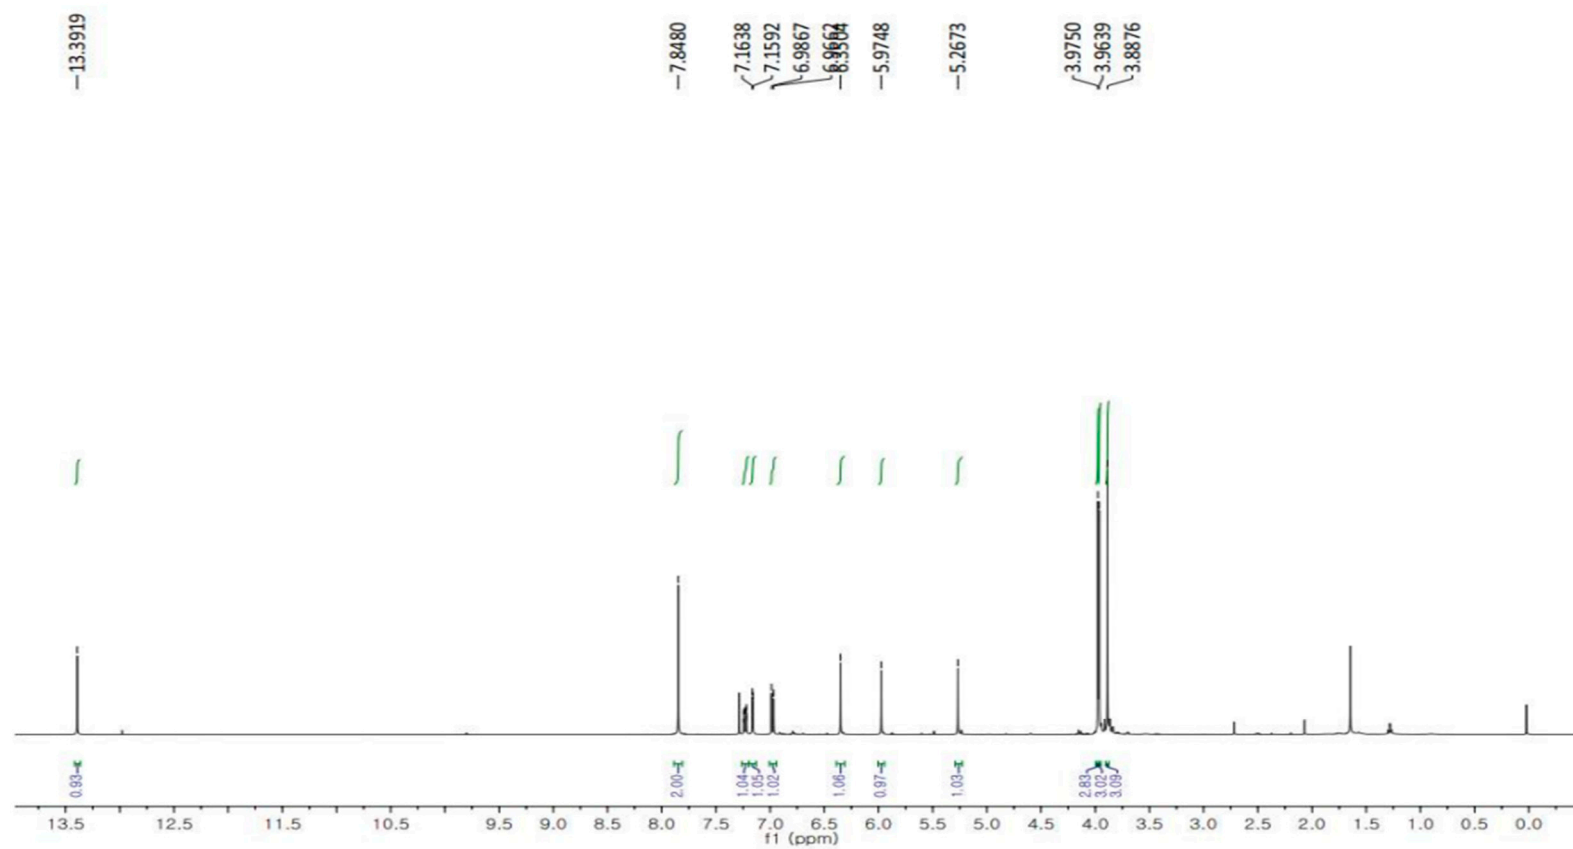

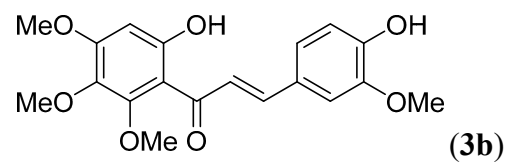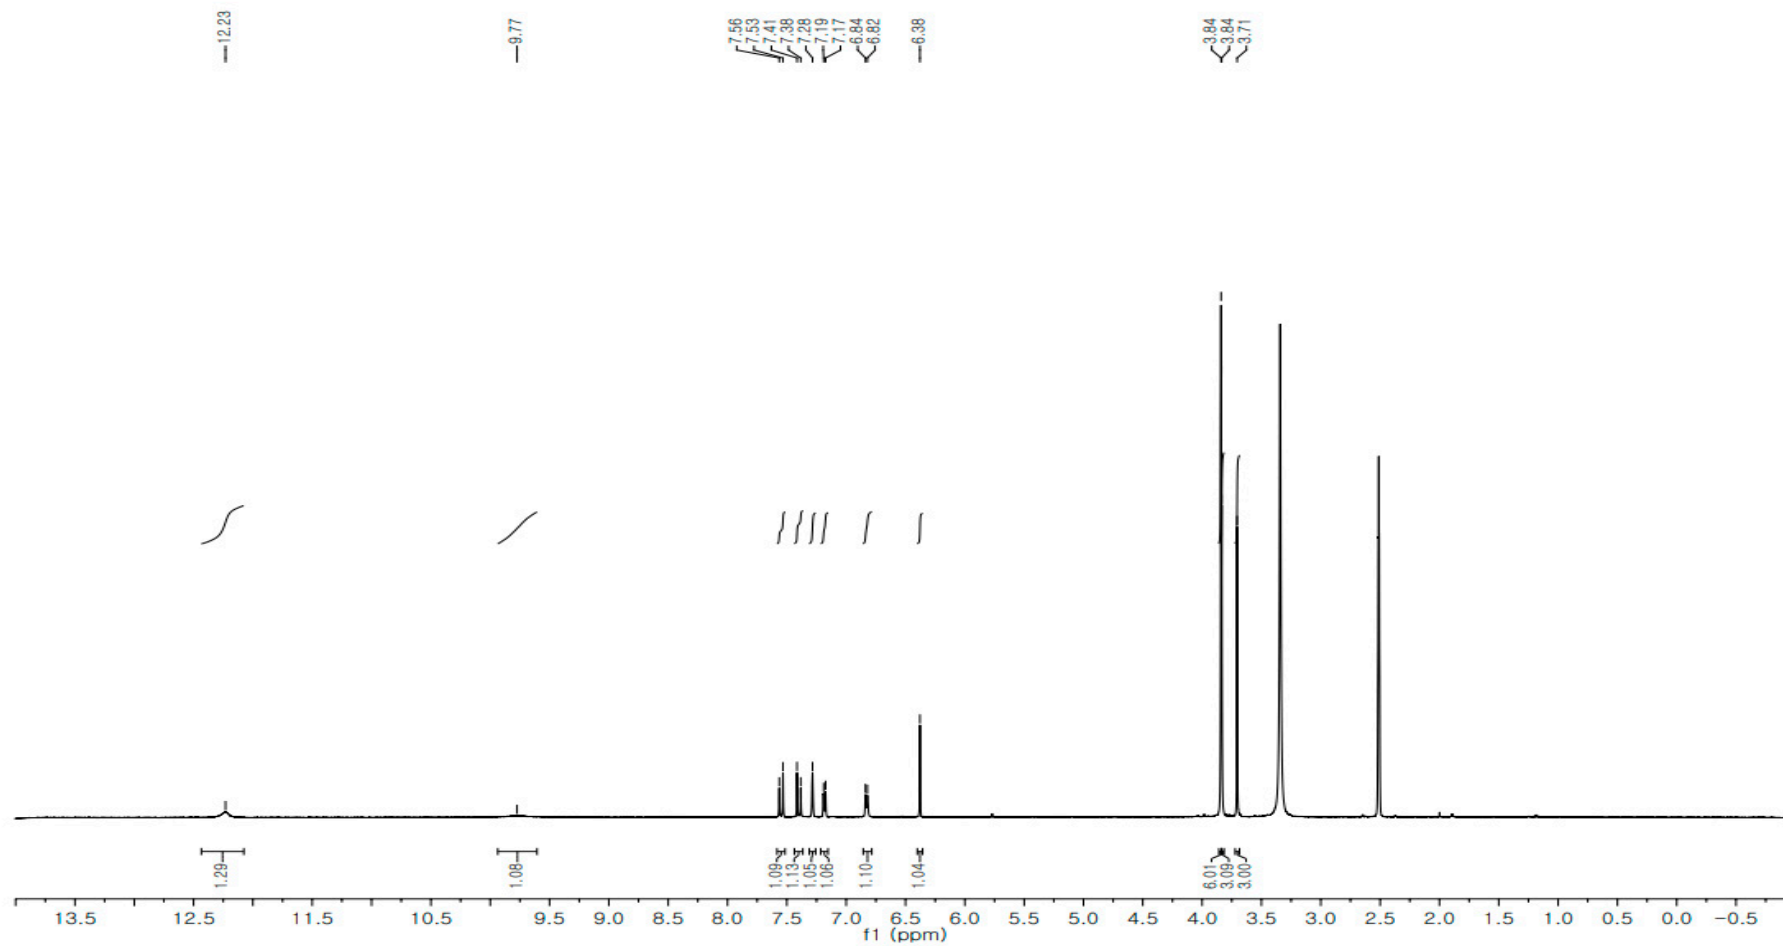

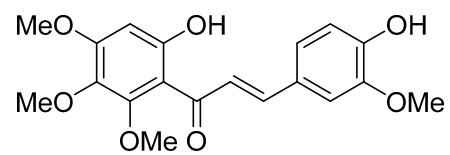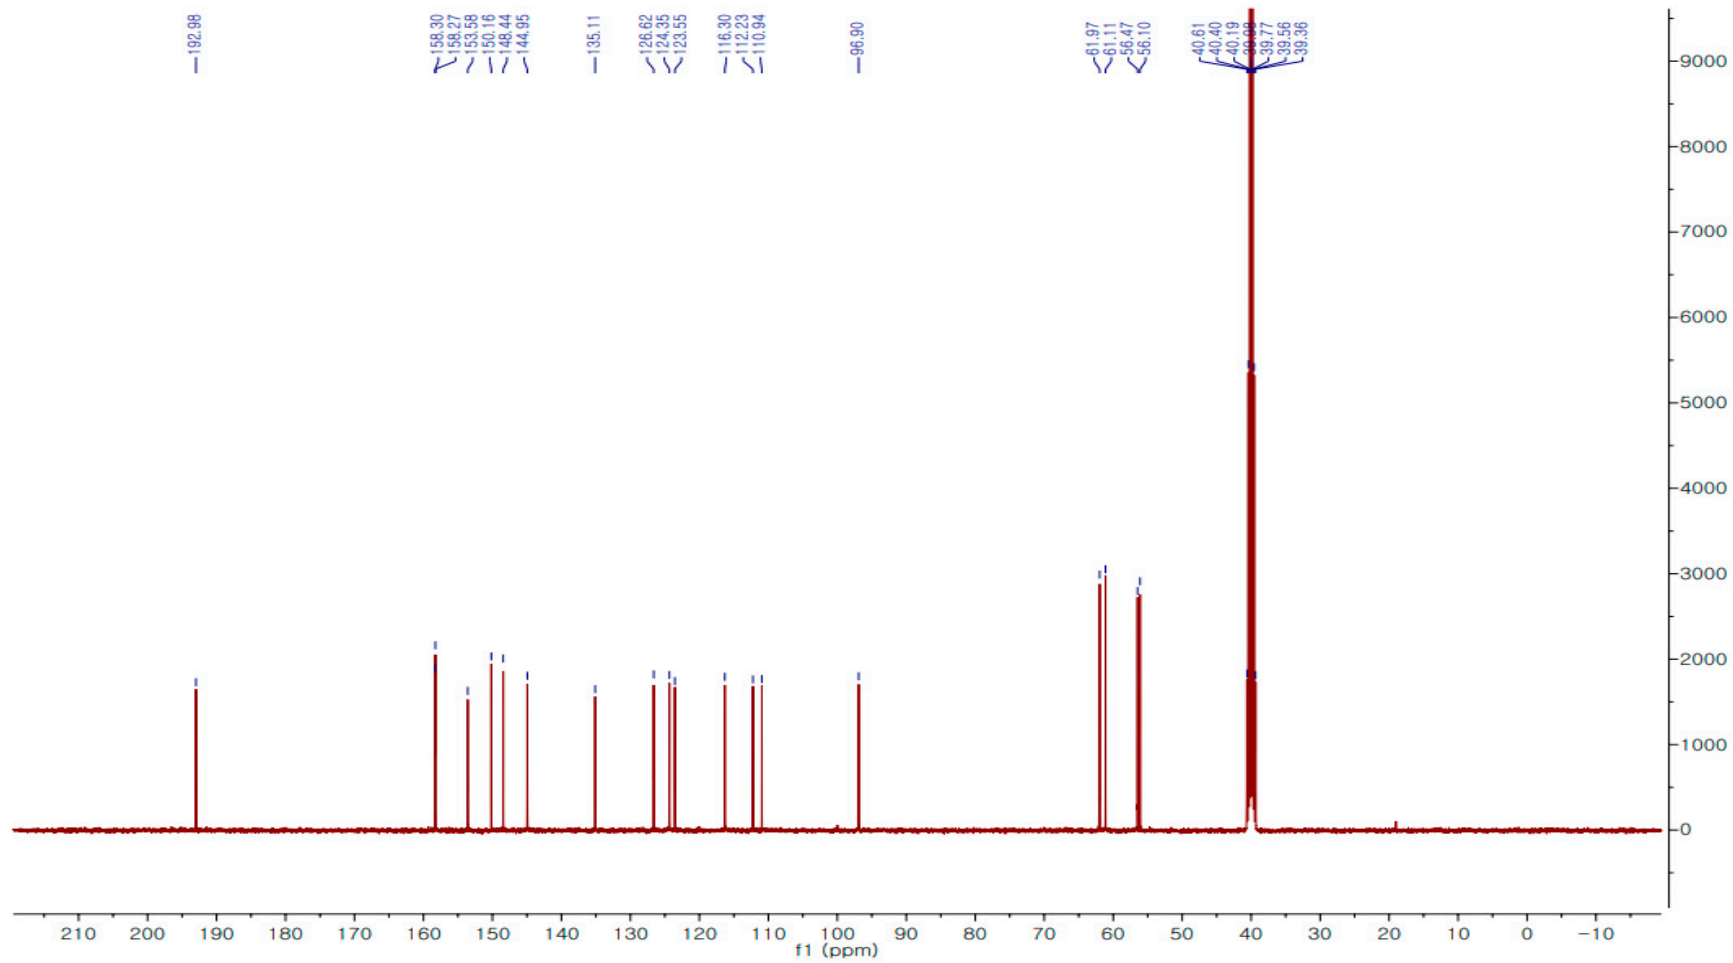

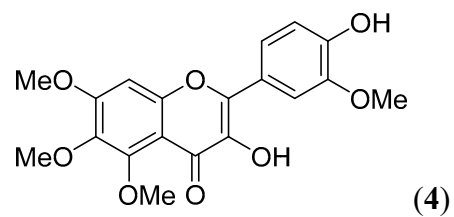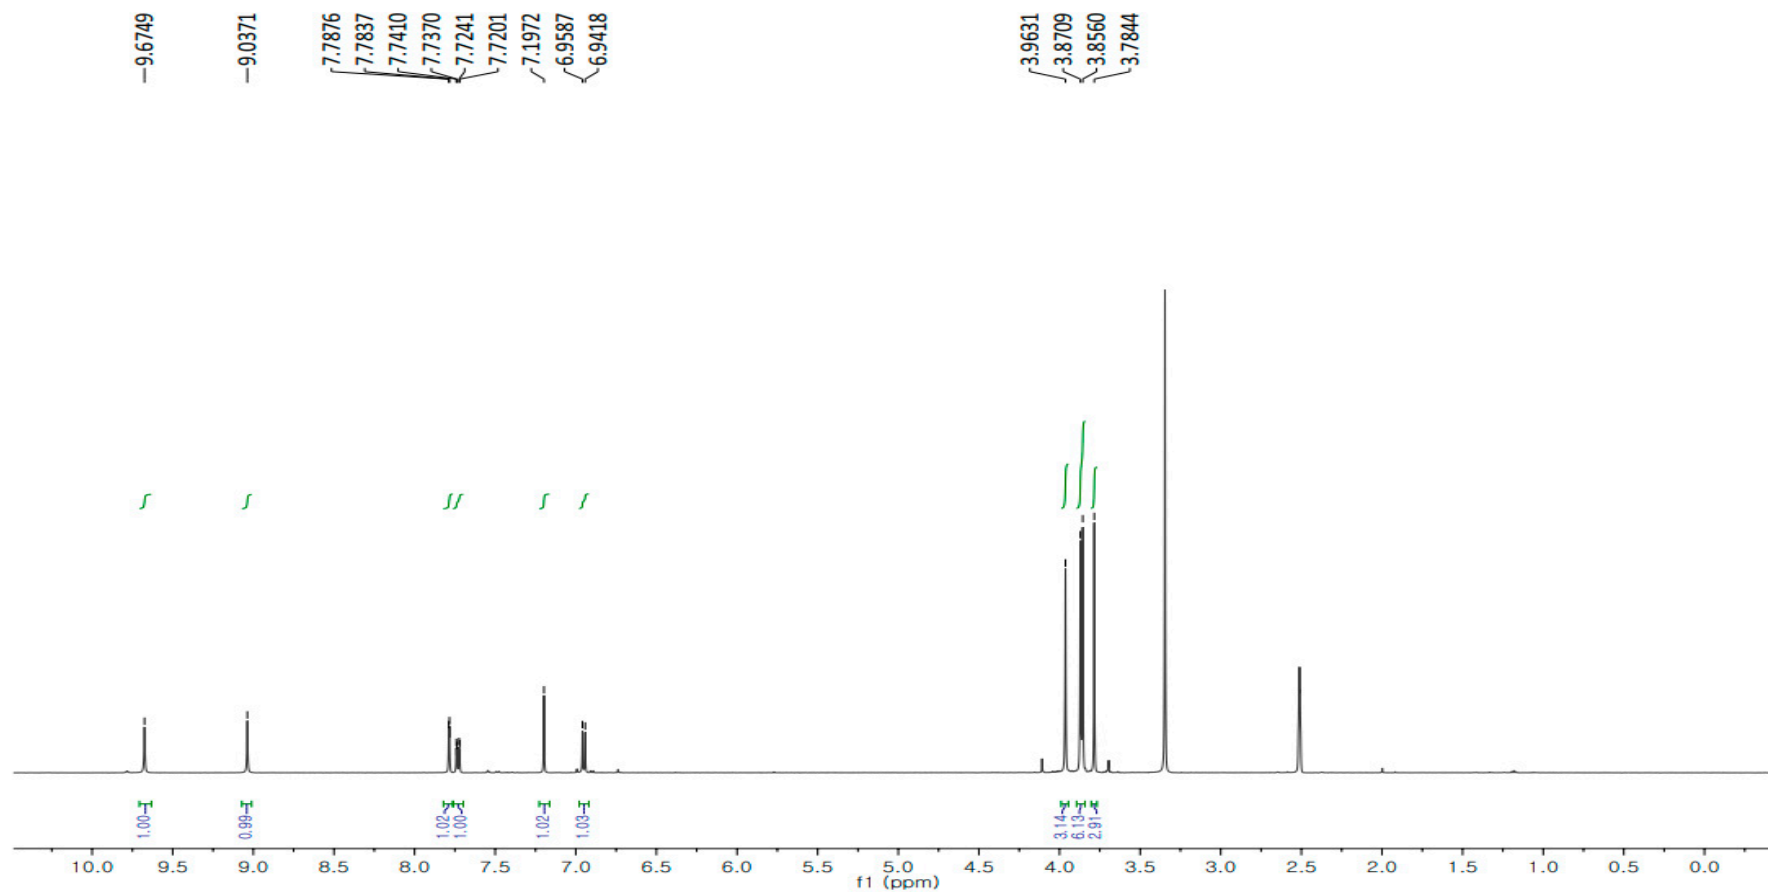



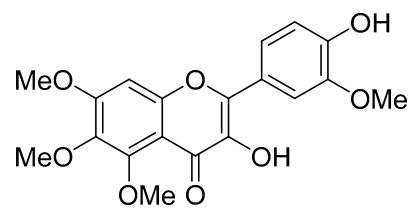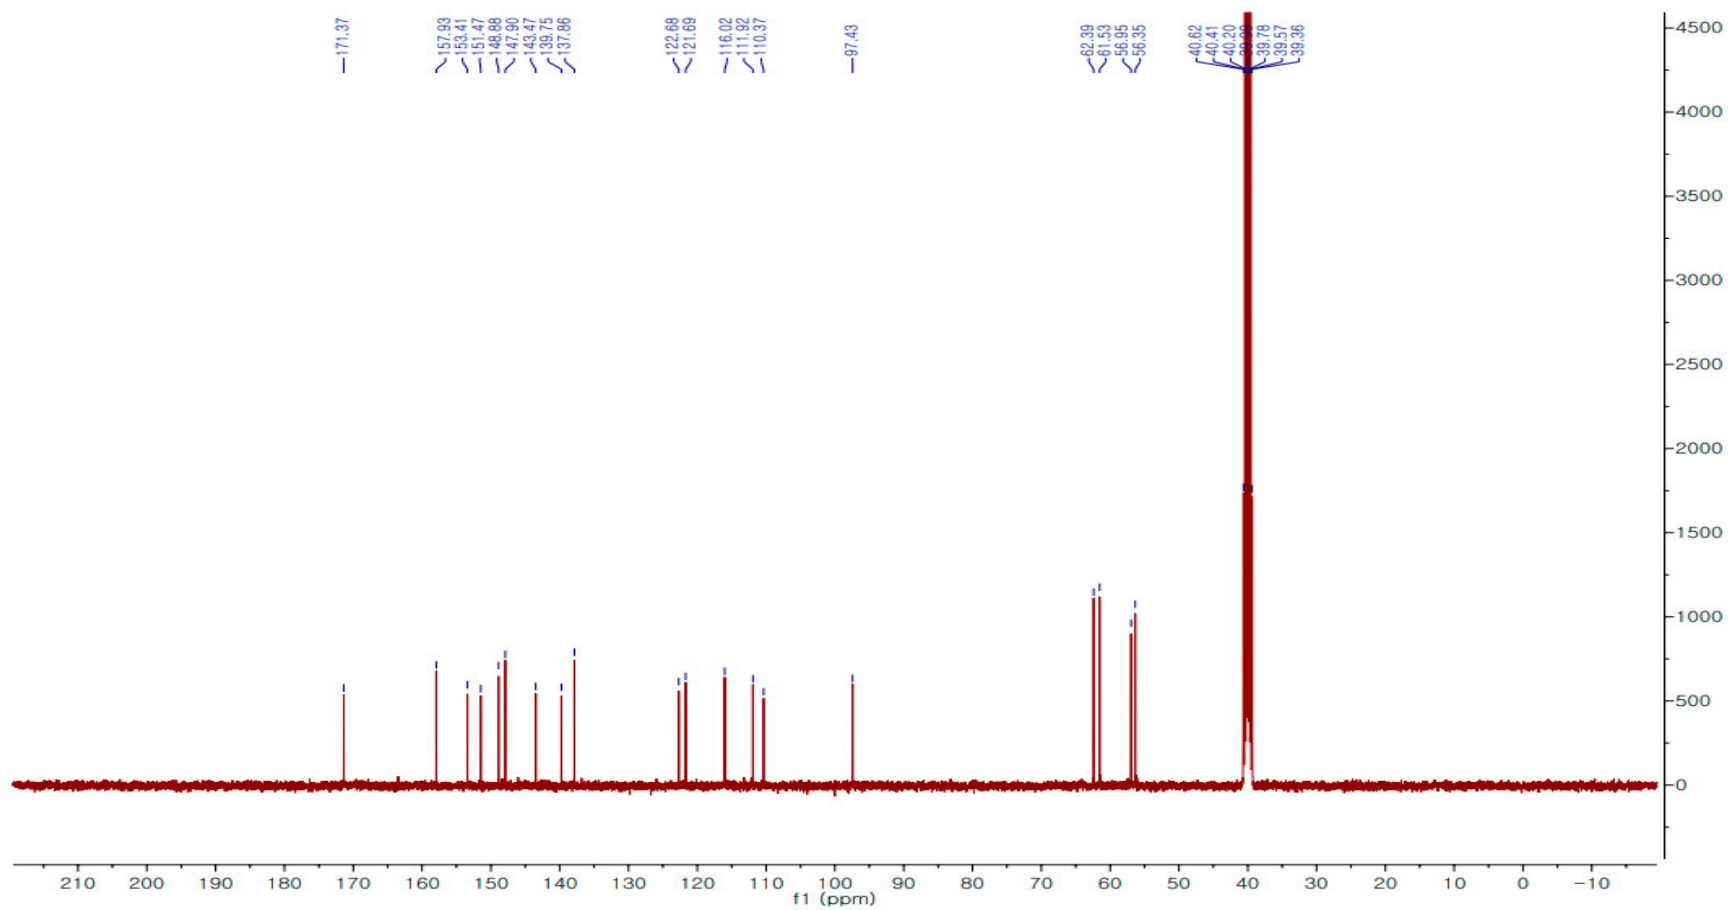

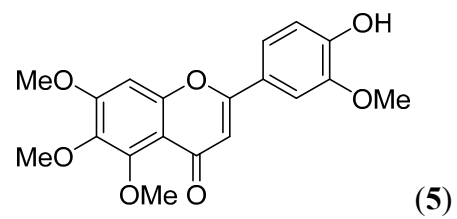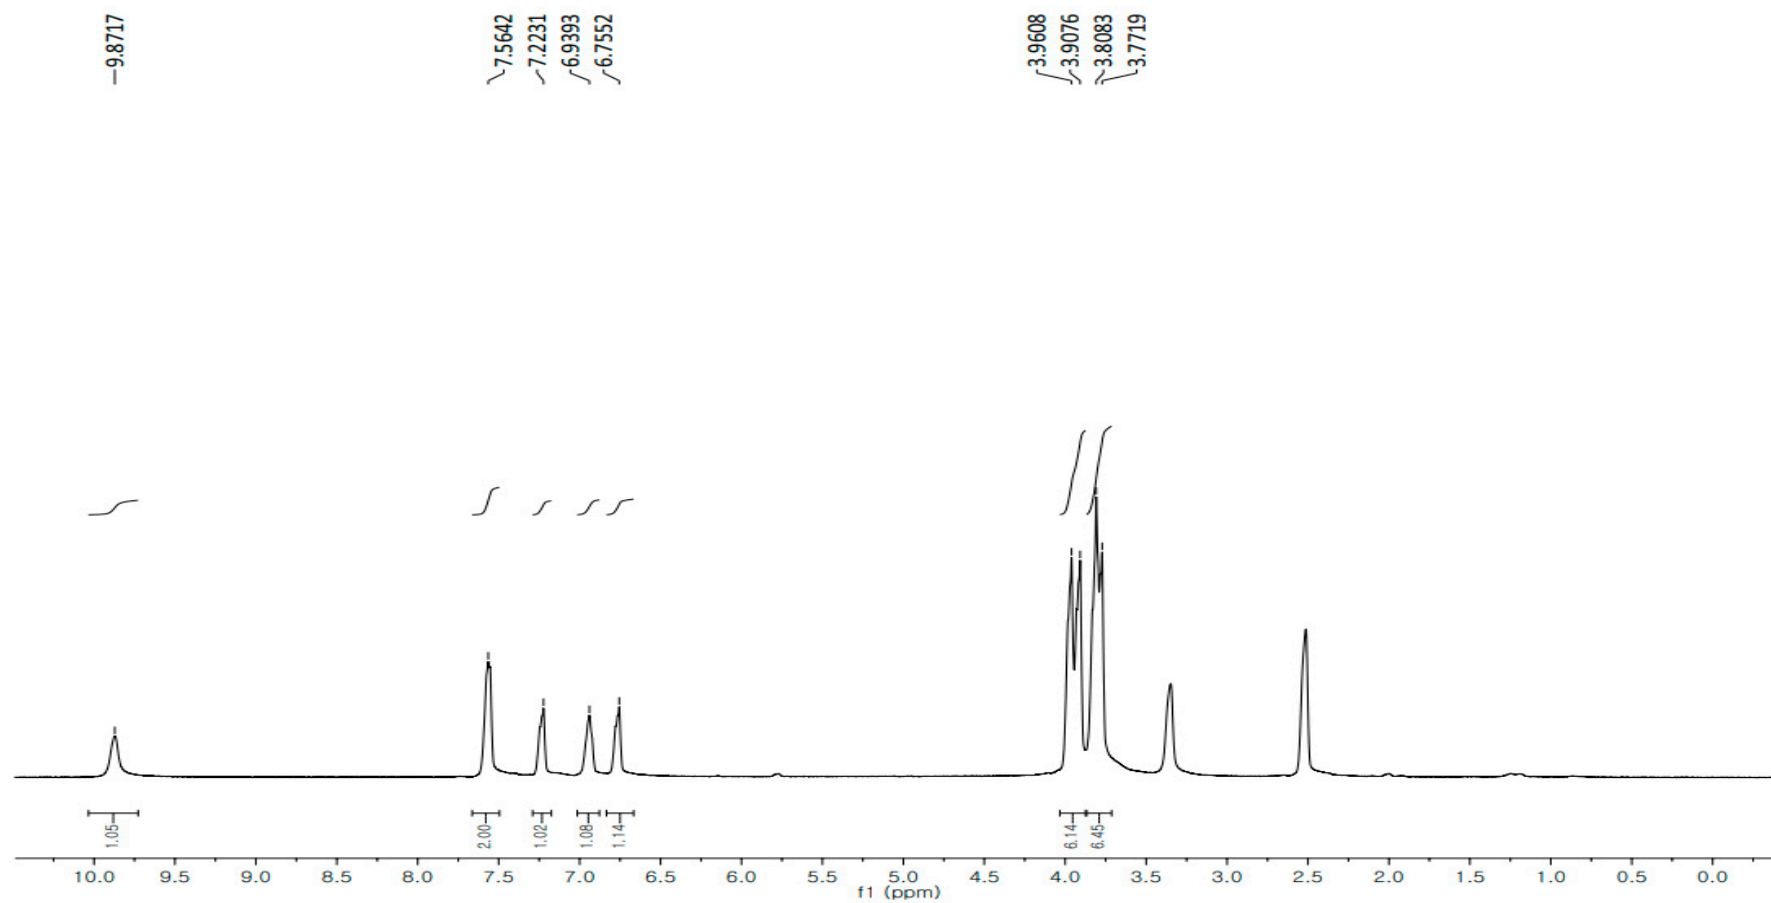

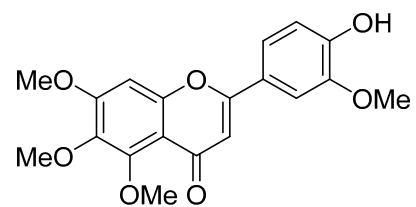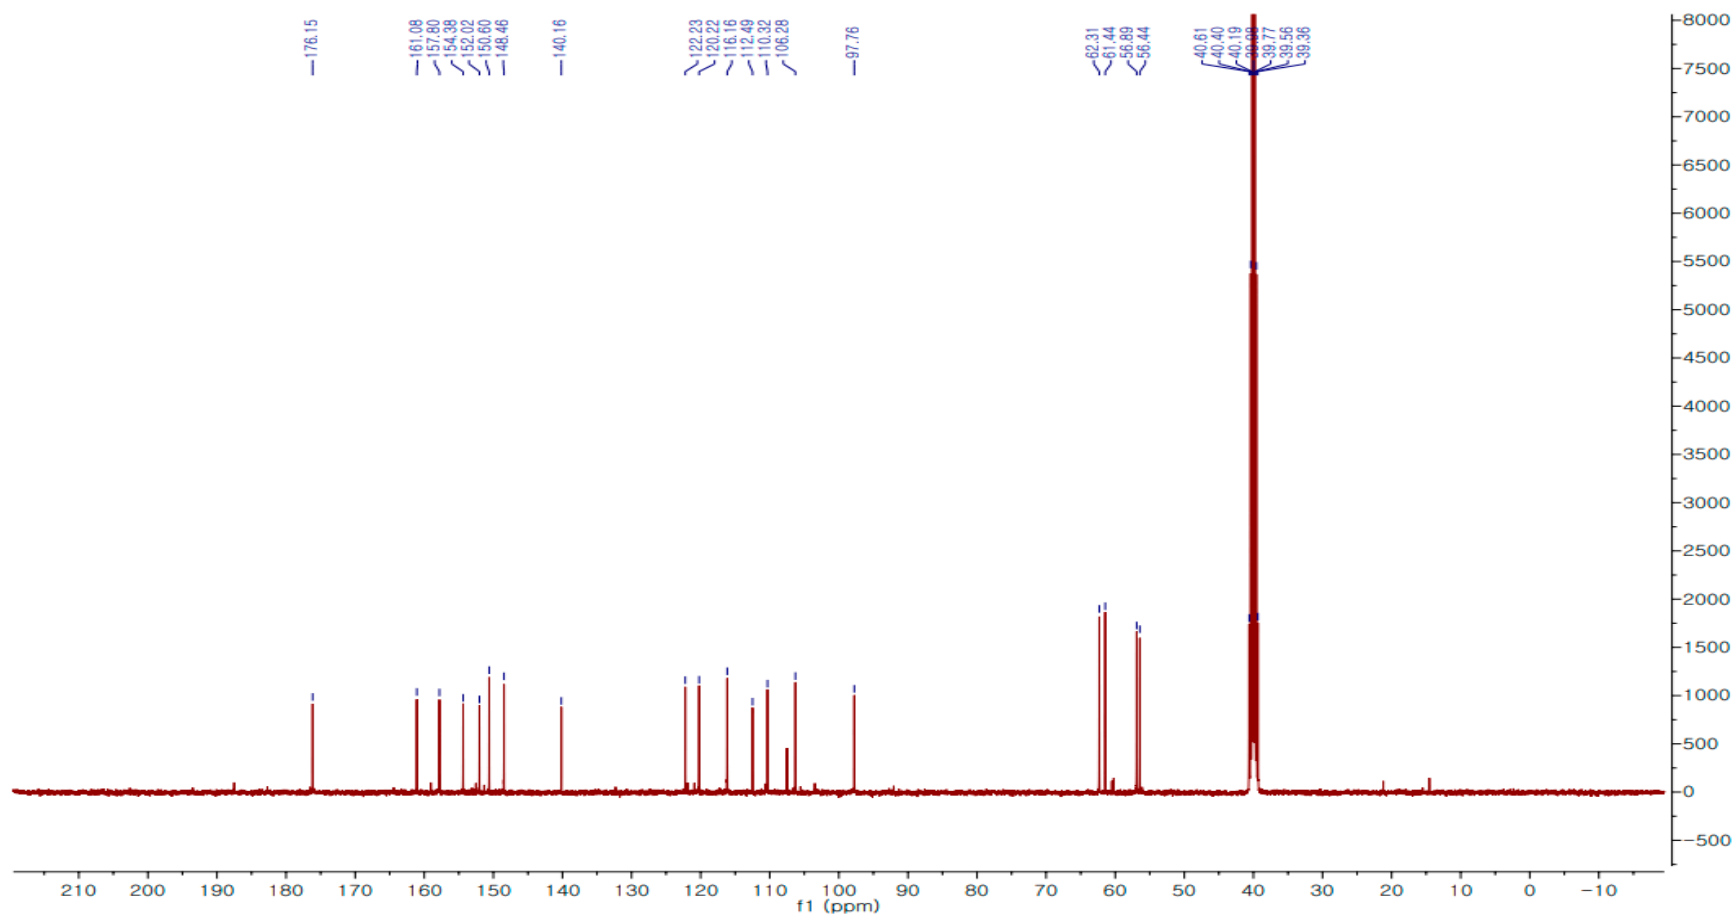

Crude NMR during demethylation of **5** (after 32 h)

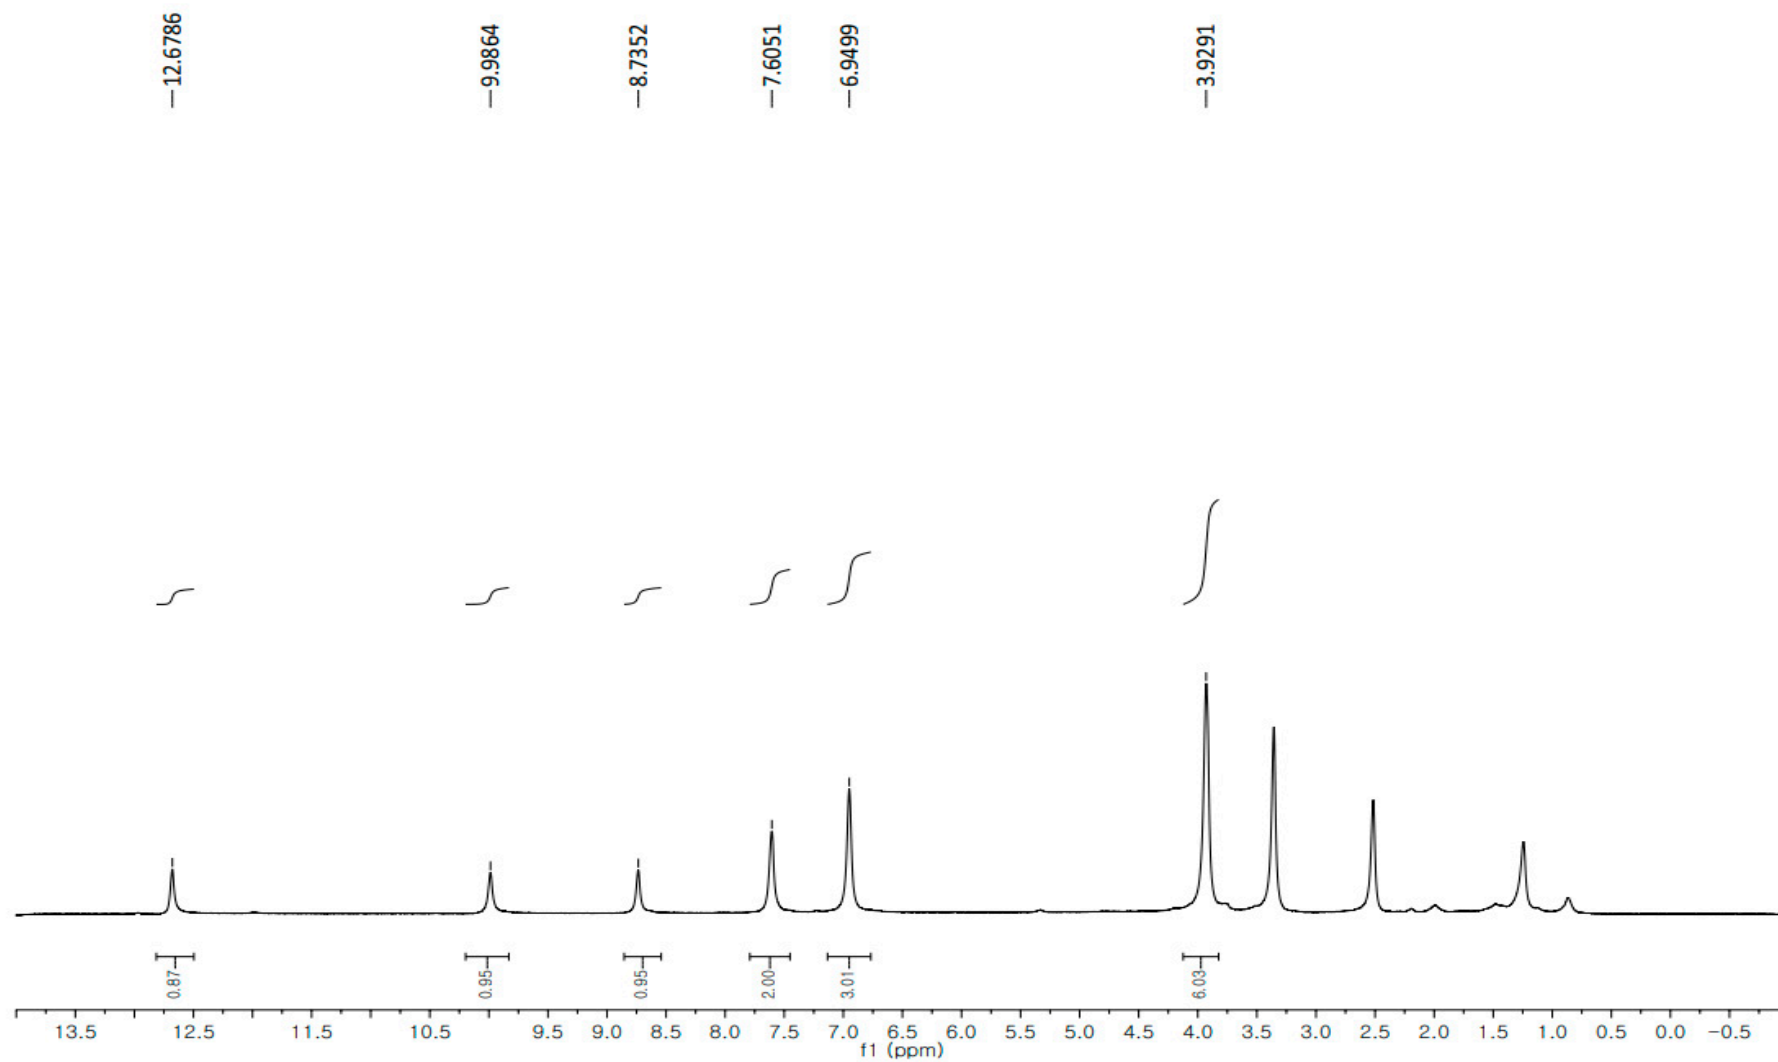

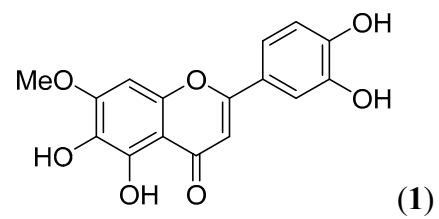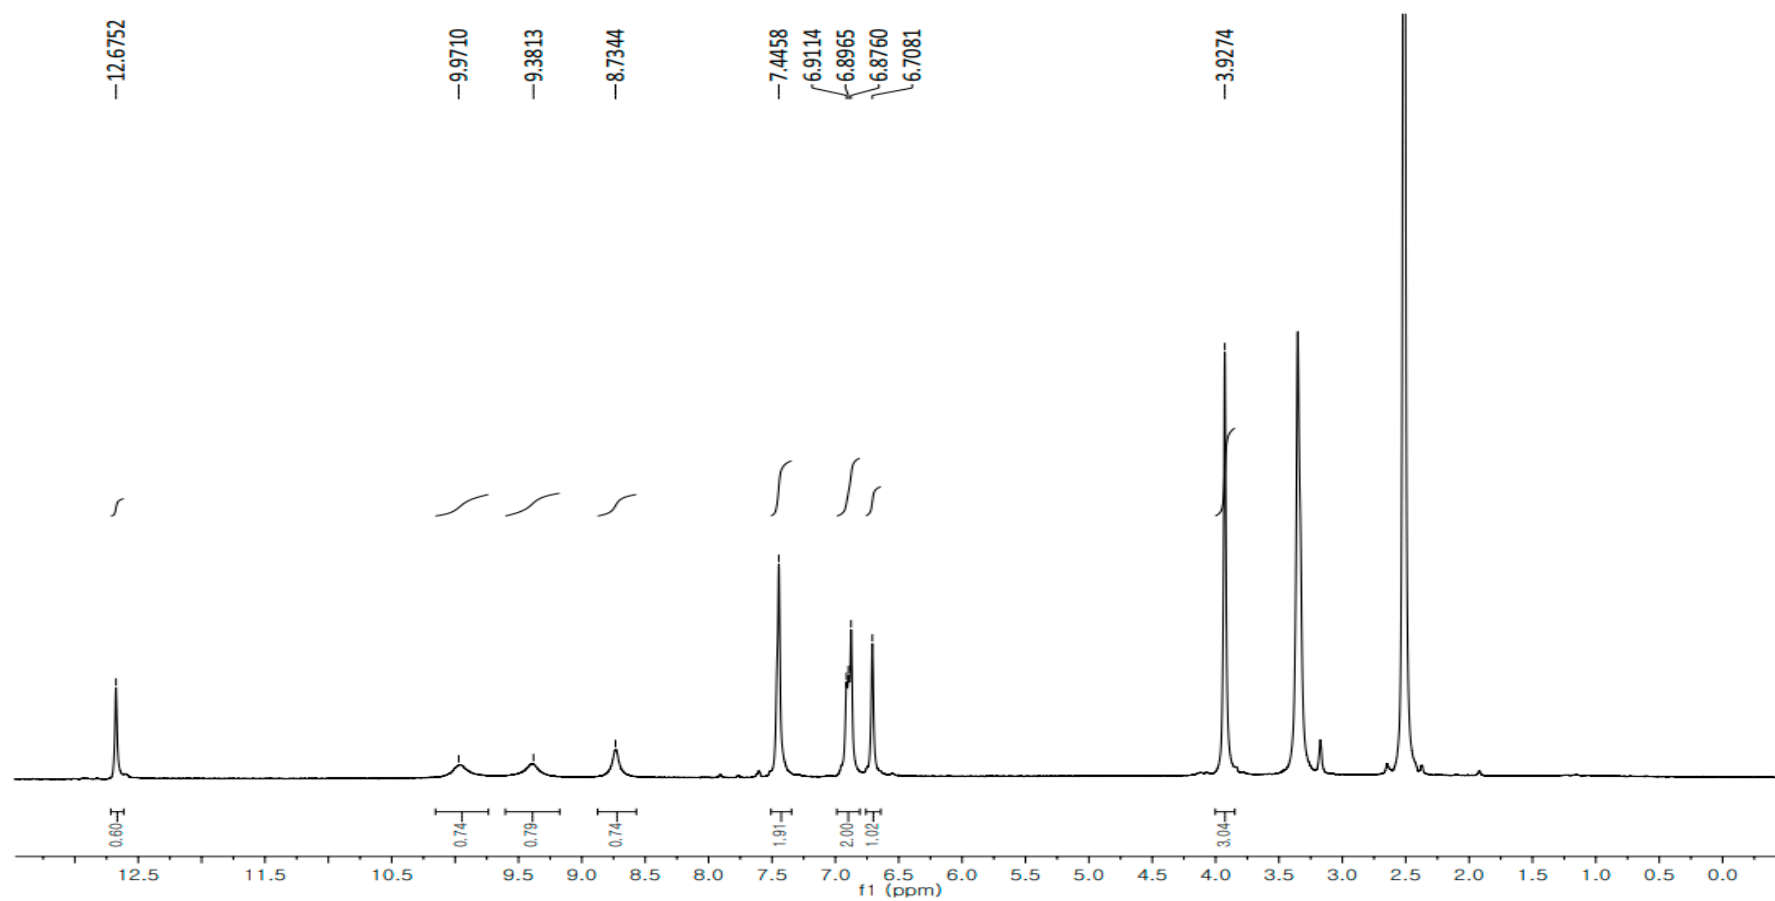

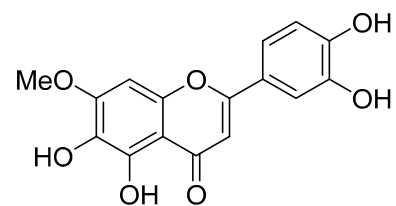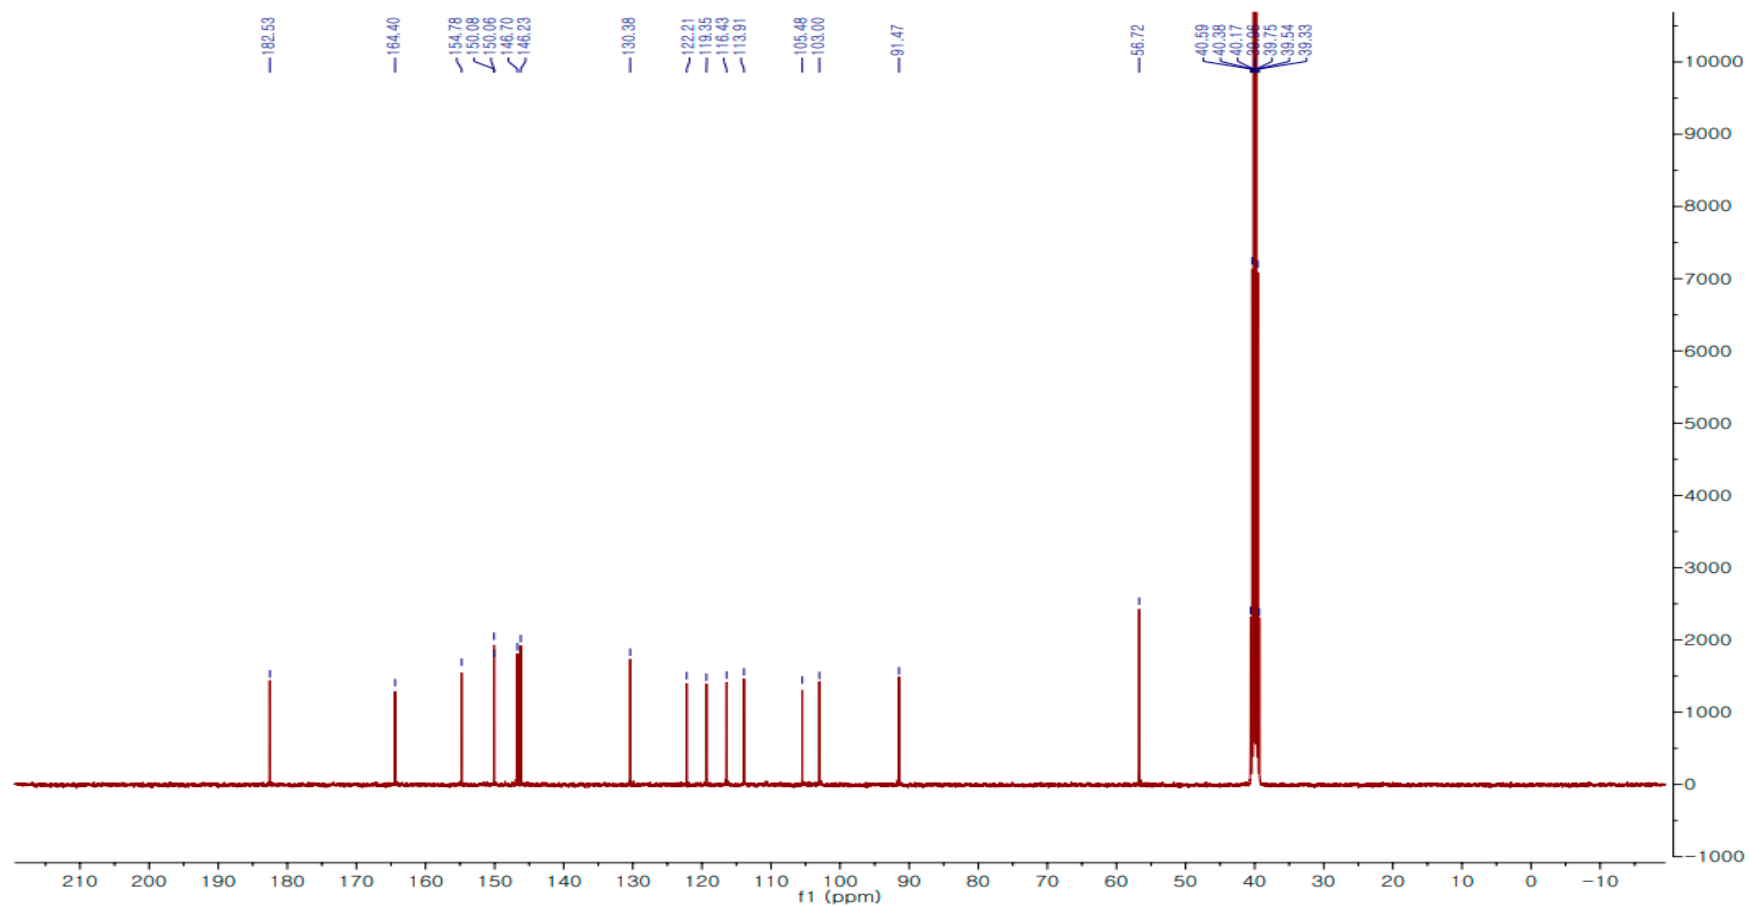

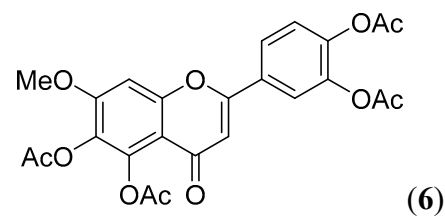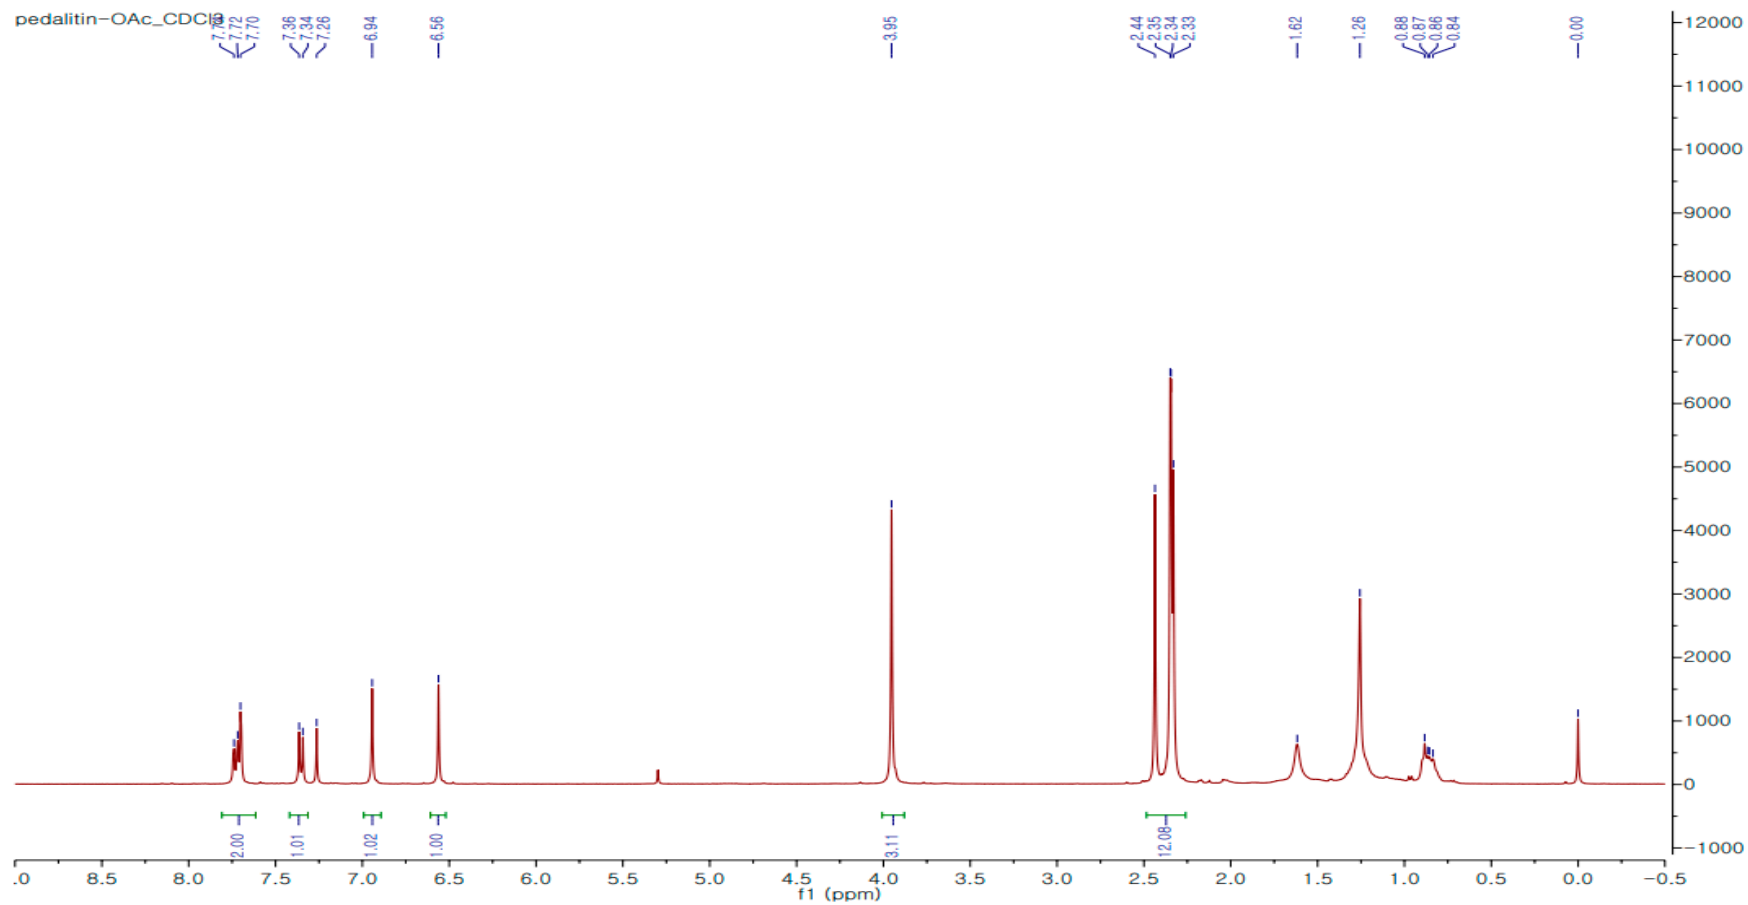

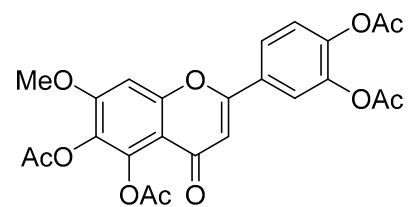

Pedalitin-OAc\_CDCI3(13C)

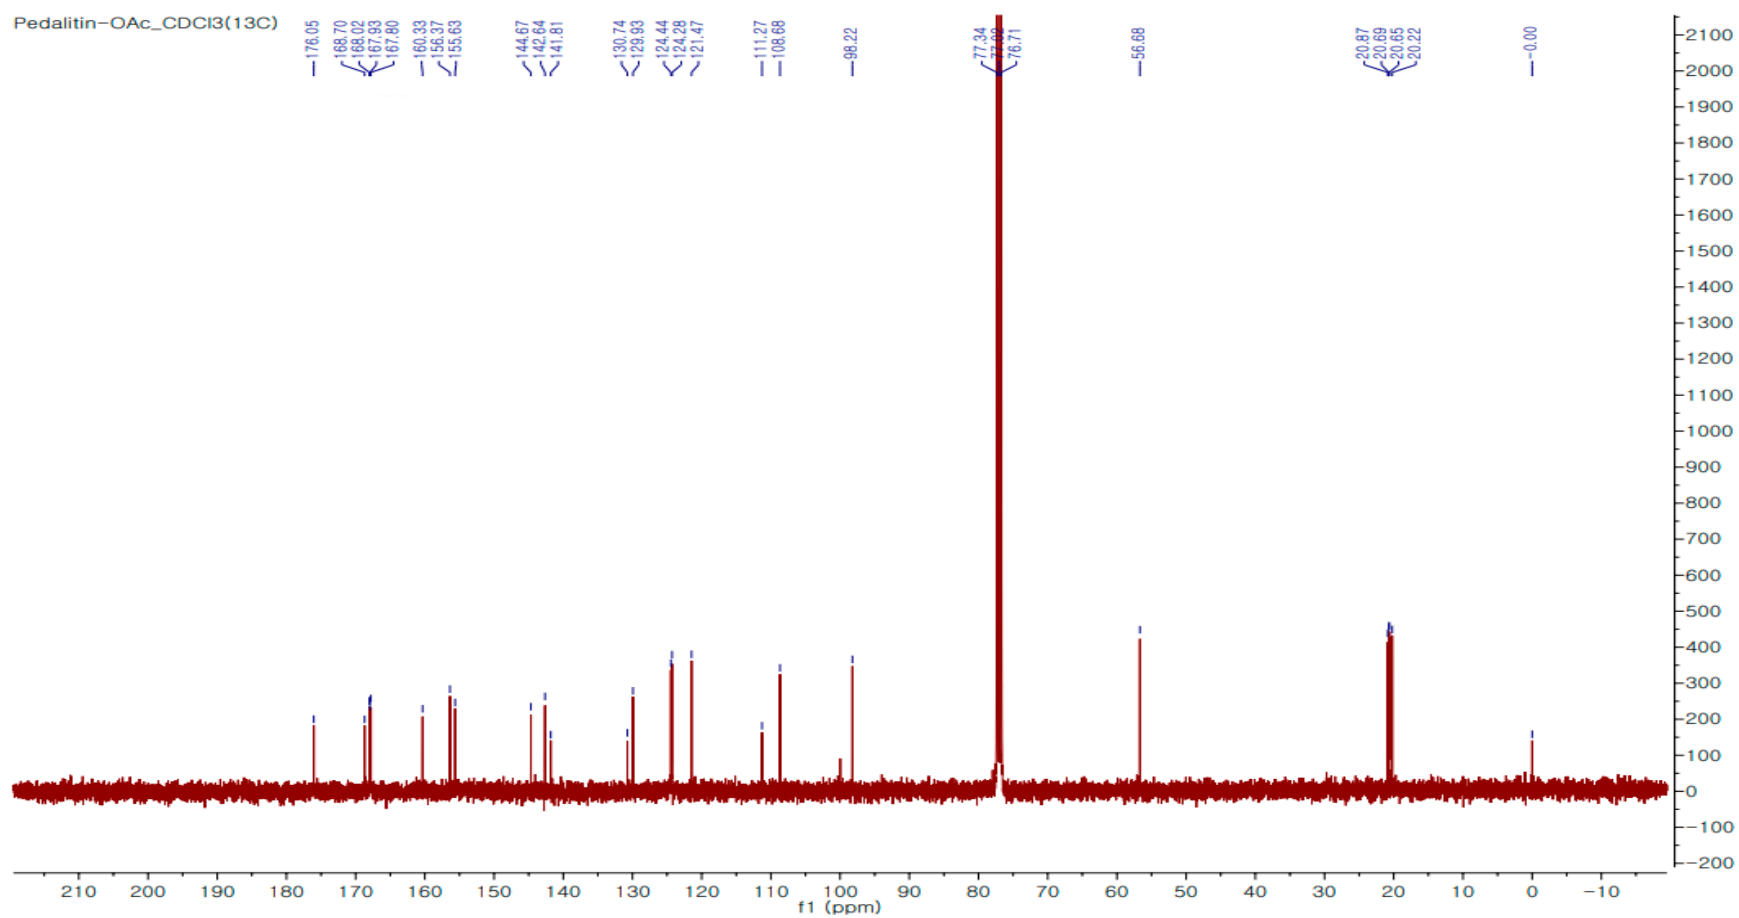

Supplement: s1 [file s1]
